# Supplementary material for: High thermoelectric performance of Ag doped SnTe polycrystalline bulks via the synergistic manipulation of electrical and thermal transport
Source: Royal Society of Chemistry journal article supplement (doi:10.1039/c9cp03534f), 2019-01-01
Supplement: c9cp03534f1.pdf [file c9cp03534f1.pdf]

## Electronic Supplementary Information

### High thermoelectric performance of Ag doped SnTe polycrystalline bulks via the synergistic manipulation of electrical and thermal transport

Lanling Zhao<sup>a,b</sup>, Jun Wang<sup>c</sup>, Jichao Li<sup>a</sup>, Jian Liu<sup>a</sup>, Chunlei Wang<sup>a,\*</sup>, Jiyang Wang<sup>d</sup> and Xiaolin Wang<sup>b,\*</sup>

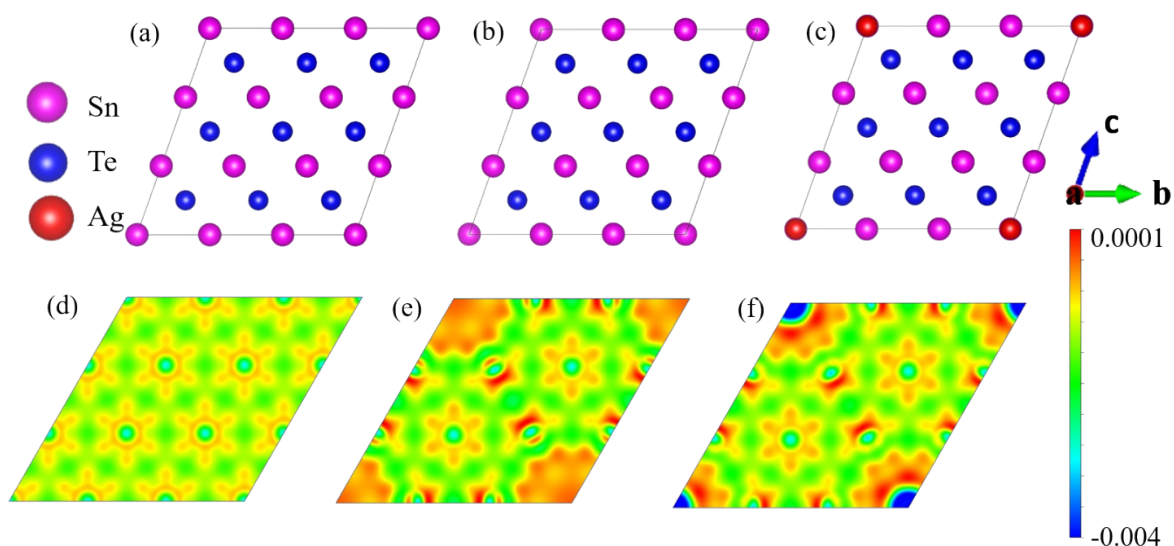

Fig. S1  $\text{Sn}_{27}\text{Te}_{27}$  (a),  $\text{Sn}_{26}\text{Te}_{27}$  (b), and  $\text{Sn}_{26}\text{AgTe}_{27}$  (c) primitive cells used for the DFT calculations, and the 2-dimensional charge density difference for the (001) planes of  $\text{Sn}_{27}\text{Te}_{27}$  (d),  $\text{Sn}_{26}\text{Te}_{27}$  (e), and  $\text{Sn}_{26}\text{AgTe}_{27}$  (f). Blue and yellow colours represent loss and gain of electrons, respectively.

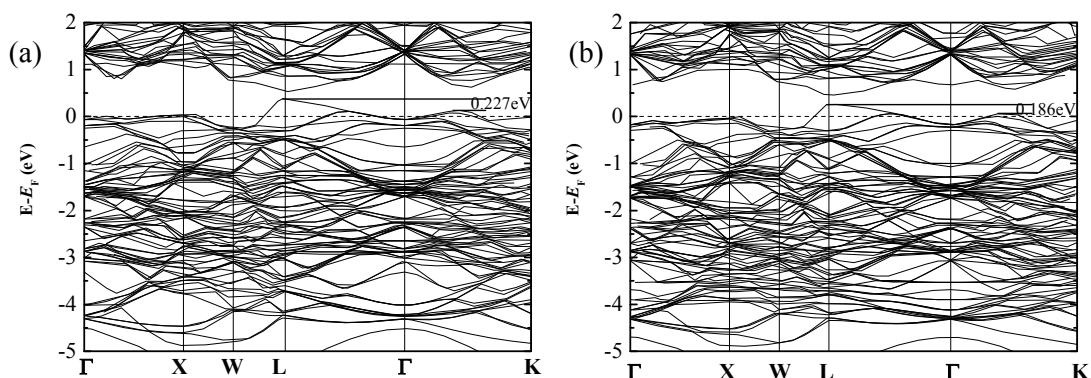

Fig. S2 Calculated electronic band structures for the Sn-deficient  $\text{Sn}_{26}\text{Te}_{27}$  (a) and silver-doped  $\text{Sn}_{26}\text{AgTe}_{27}$  (b) using Perdue Burke Ernzerhof generalized gradient approximations (PBE-GGA) based on density functional theory (DFT).

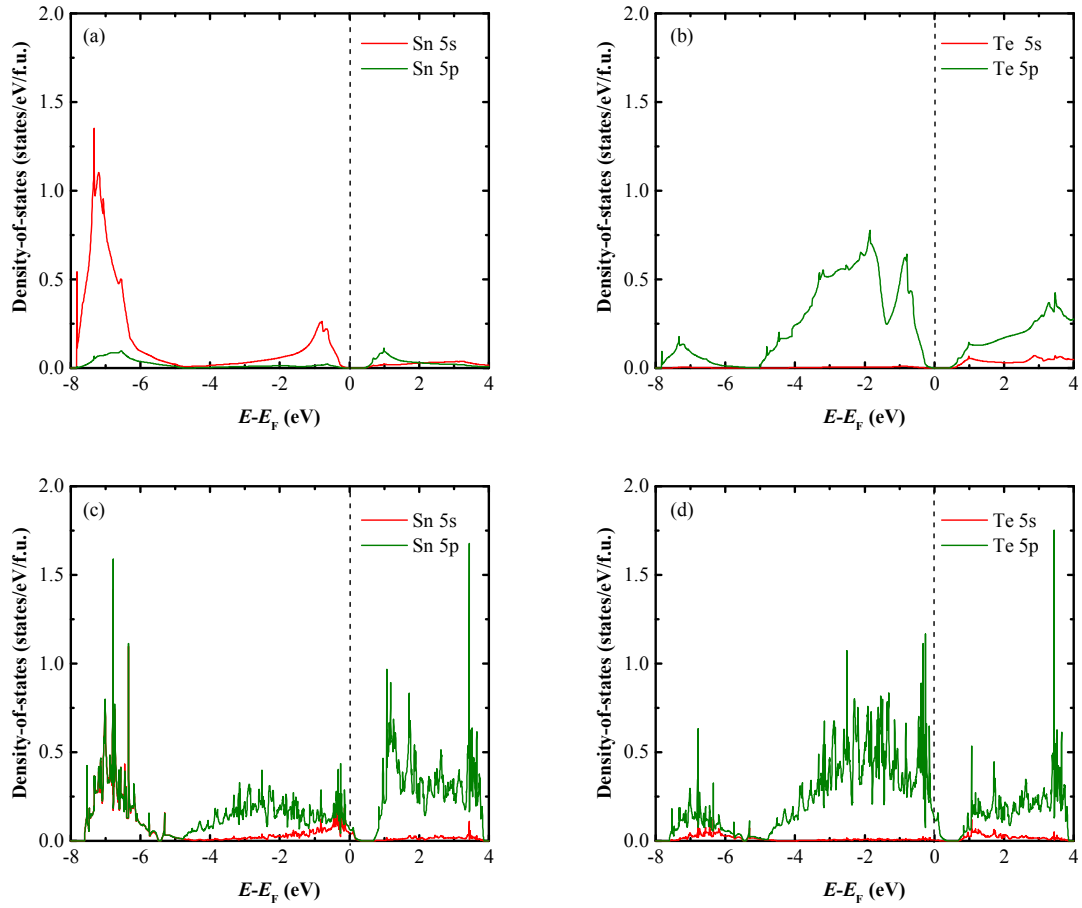

Fig. S3 Calculated partial electronic density-of-states (DOS) for SnTe (a, b) and  $\text{Sn}_{26}\text{Te}_{27}$  (c, d) based on the DFT method.

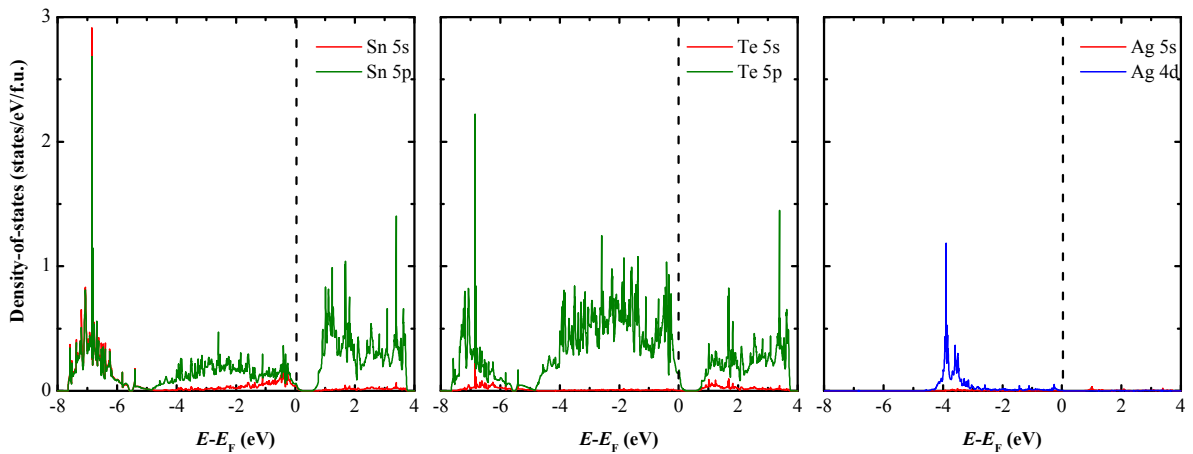

Fig. S4 Calculated partial electronic density-of-states (DOS) for the silver doped  $\text{Sn}_{26}\text{AgTe}_{27}$  based on the DFT method.

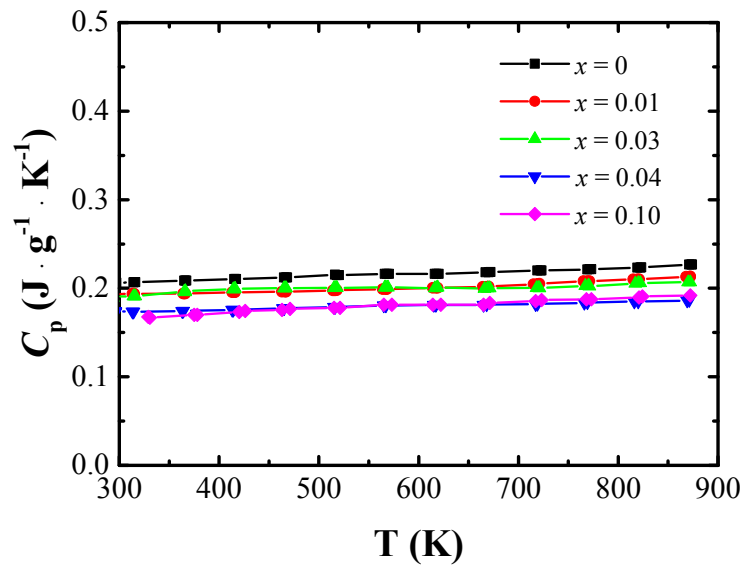

Fig. S5 Temperature dependence of the specific heat for the excess-silver-doped  $\text{SnAg}_x\text{Te}$  ( $x = 0, 0.01, 0.03, 0.04, 0.10$ ) samples.

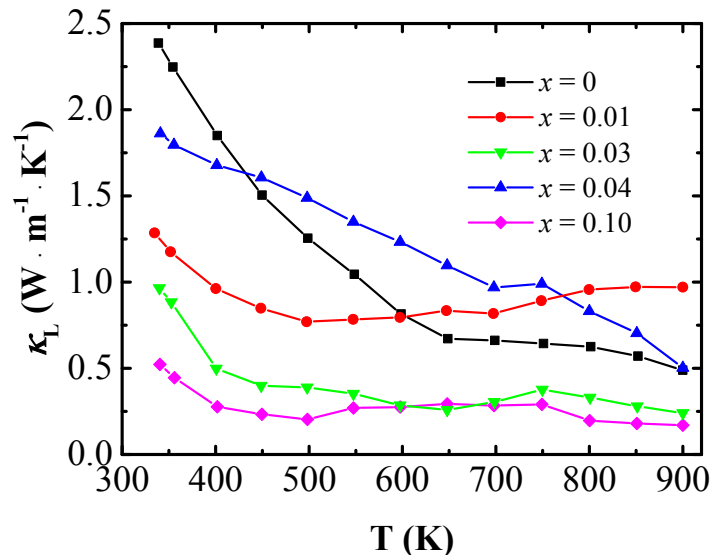

Fig. S6 Temperature dependence of the lattice thermal conductivity ( $\kappa_L$ ) for the synthesized  $\text{SnAg}_x\text{Te}$  ( $x = 0, 0.01, 0.03, 0.04, 0.10$ ) samples.
